# Supplementary material for: Oral HPV16 Prevalence in Oral Potentially Malignant Disorders and Oral Cavity Cancers
Source: PubMed Central journal article supplement (PMC7072384; doi:10.3390/biom10020223), 2020-02-03
Supplement: biomolecules-10-00223-s001.pdf [file biomolecules-10-00223-s001.pdf]

**Supplementary Table S1: Clinical characteristics of OPMD.**

|                           | <b>OPMD (n = 83)</b> |
|---------------------------|----------------------|
| <b>Diagnosis</b>          |                      |
| Benign squamous papilloma | 3 (3.6)              |
| Oral Leukoplakia          | 22 (26.5)            |
| Oral Lichen Planus        | 9 (10.8)             |
| Oral Lichenoid Lesion     | 5 (6.0)              |
| Dysplasia                 | 40 (48.2)            |
| NA                        | 4 (4.8)              |
|                           |                      |
| <b>Anatomic sites</b>     |                      |
| Tongue                    | 33 (39.8)            |
| Floor of mouth            | 6 (7.2)              |
| Alveolus                  | 6 (7.2)              |
| Buccal mucosa             | 16 (19.3)            |
| Retromolar trigone        | 1 (1.2)              |
| Hard palate               | 3 (3.6)              |
| Others                    | 4 (4.8)              |
| N/A                       | 14 (16.9)            |

**Supplementary Table S2: Clinical characteristics of OC.**

|                       | <b>OC (n = 106)</b> |
|-----------------------|---------------------|
| <b>AJCC TNM</b>       |                     |
| Stage I               | 21 (19.8)           |
| Stage II              | 27 (25.5)           |
| Stage III             | 7 (6.6)             |
| Stage IV              | 35 (33.0)           |
| NA                    | 16 (15.1)           |
|                       |                     |
| <b>Anatomic sites</b> |                     |
| Tongue                | 51 (48.1)           |
| Floor of mouth        | 22 (20.8)           |
| Alveolus              | 15 (14.2)           |
| Buccal mucosa         | 6 (5.7)             |
| Retromolar trigone    | 7 (6.6)             |
| Hard palate           | 5 (4.7)             |

**Supplementary Table S3: HPV-16 genotyping in unstimulated saliva, oral rinse, oral swab and tumour biopsies of OPMD patients.**

| Sample  | Unstimulated saliva | Oral rinse | Oral swab        | Tumour biopsy |
|---------|---------------------|------------|------------------|---------------|
| OPMD 12 | No                  | No         | No               | No            |
| OPMD 14 | No                  | No         | No               | No            |
| OPMD 18 | No                  | No         | No               | No            |
| OPMD 21 | No                  | No         | Insufficient DNA | No            |
| OPMD 24 | No                  | No         | Insufficient DNA | No            |
| OPMD 25 | No                  | No         | No               | No            |
| OPMD 29 | No                  | No         | No               | No            |
| OPMD 30 | Yes                 | Yes        | No               | Yes           |
| OPMD 31 | No                  | No         | No               | No            |

**Supplementary Table S4: HPV-16 infection (saliva and tumour biopsy) and tumour p16INK4a in OC patients.**

| Sample | Saliva | Tumour biopsy | p16INK4a status |
|--------|--------|---------------|-----------------|
| OC 1   | No     | No            | Negative        |
| OC 2   | Yes    | Yes           | Positive        |
| OC 3   | No     | No            | Negative        |
| OC 4   | No     | No            | Negative        |
| OC 7   | No     | No            | Positive        |
| OC 8   | No     | No            | Negative        |
| OC 9   | No     | No            | Negative        |
| OC 11  | No     | No            | Negative        |
| OC 69  | No     | No            | UNKNOWN         |
| OC 72  | No     | No            | Positive        |
| OC 76  | No     | No            | UNKNOWN         |
| OC 79  | No     | No            | UNKNOWN         |
| OC 85  | No     | No            | UNKNOWN         |
| OC 87  | No     | No            | Positive        |
